# Supplementary material
Source: ML conference proceedings conference paper supplement (https://proceedings.mlr.press/v119/monfared20a.html)
Supplement: Supplementary file 1 [file monfared20a-supp.pdf]

## 7. Supplementary material

### 7.1. Sub-regions corresponding to system (9)

All sub-regions related to (9) can be defined as follows (Monfared & Durstewitz, 2020):

$$\begin{aligned} S_{\Omega^1} &= \hat{S}_0 = \hat{S}_{\underbrace{(000 \dots 0)}_M}_2 = \hat{S}_{\underbrace{000 \dots 0}_M} \\ &= \left\{ Z_t \in \mathbb{R}^M; z_{it} \leq 0, i = 1, 2, \dots, M \right\}, \end{aligned} \quad (18)$$

$$\begin{aligned} S_{\Omega^2} &= \hat{S}_1 = \hat{S}_{\underbrace{(00 \dots 01)}_M}_2 = \hat{S}_{\underbrace{100 \dots 0}_M} \\ &= \left\{ Z_t \in \mathbb{R}^M; z_{1t} > 0, z_{it} \leq 0, i \neq 1 \right\}, \end{aligned} \quad (19)$$

$$\begin{aligned} S_{\Omega^3} &= \hat{S}_2 = \hat{S}_{\underbrace{(0 \dots 010)}_M}_2 = \hat{S}_{\underbrace{1010 \dots 0}_M} \\ &= \left\{ Z_t \in \mathbb{R}^M; z_{2t} > 0, z_{it} \leq 0, i \neq 2 \right\}, \end{aligned} \quad (20)$$

$$\begin{aligned} S_{\Omega^4} &= \hat{S}_3 = \hat{S}_{\underbrace{(0 \dots 011)}_M}_2 = \hat{S}_{\underbrace{110 \dots 0}_M} \\ &= \left\{ Z_t \in \mathbb{R}^M; z_{1t}, z_{2t} > 0, z_{it} \leq 0, i \neq 1, 2 \right\}, \end{aligned} \quad (21)$$

$$\begin{aligned} S_{\Omega^5} &= \hat{S}_4 = \hat{S}_{\underbrace{(0 \dots 100)}_M}_2 = \hat{S}_{\underbrace{0010 \dots 0}_M} \\ &= \left\{ Z_t \in \mathbb{R}^M; z_{3t} > 0, z_{it} \leq 0, i \neq 3 \right\}, \end{aligned} \quad (22)$$

$$\begin{aligned} &\vdots \\ S_{\Omega^{2^M}} &= \hat{S}_{2^M - 1} = \hat{S}_{\underbrace{(111 \dots 1)}_M}_2 = \hat{S}_{\underbrace{111 \dots 1}_M} \\ &= \left\{ Z_t \in \mathbb{R}^M; z_{it} > 0, i = 1, 2, \dots, M \right\}. \end{aligned} \quad (23)$$

where each subindex  $d$  of  $\hat{S}$ ,  $0 \leq d \leq 2^M - 1$ , is associated with a sequence  $d_M d_{M-1} \dots d_2 d_1$  of binary digits. The notation  $(d_1 d_2 \dots d_M)_2^*$  in building each corresponding sequence stands for the mirror image of the binary representation of  $d$  with  $M$  digits. By mirror image here we mean writing digits  $d_1 d_2 \dots d_M$  from right to left, i.e.  $d_M d_{M-1} \dots d_2 d_1$ . For example, for  $M = 2$  there are 4 sub-regions  $S_{\Omega^k}$ ,  $k = 1, 2, 3, 4$ , associated with 4 matrices  $D_{\Omega^k} := \text{diag}(d_2, d_1)$ , where  $d_2 d_1 = (d_1 d_2)_2^*$  and  $d_i \in \{0, 1\}$  (Fig. S1).

Denoting switching boundaries  $\Sigma_{ij} = \bar{S}_{\Omega^i} \cap \bar{S}_{\Omega^j}$  between every pair of successive sub-regions  $S_{\Omega^i}$  and  $S_{\Omega^j}$  with  $i, j \in$

$\{1, 2, \dots, 2^M\}$ , we can rewrite map (7) as

$$\begin{aligned} Z_{t+1} &= F(Z_t) \\ &= \begin{cases} F_1(Z_t) = W_{\Omega^1} Z_t + h; & Z_t \in \bar{S}_{\Omega^1} \\ F_2(Z_t) = W_{\Omega^2} Z_t + h; & Z_t \in \bar{S}_{\Omega^2} \\ F_3(Z_t) = W_{\Omega^3} Z_t + h; & Z_t \in \bar{S}_{\Omega^3} \\ F_4(Z_t) = W_{\Omega^4} Z_t + h; & Z_t \in \bar{S}_{\Omega^4} \\ \vdots & \vdots \\ F_{2^M}(Z_t) = W_{\Omega^{2^M}} Z_t + h; & Z_t \in \bar{S}_{\Omega^{2^M}} \end{cases}. \end{aligned} \quad (24)$$

### 7.2. Discontinuity boundaries

Consider map (7) and two sub-regions  $S_{\Omega^i}$  and  $S_{\Omega^j}$  ( $i, j \in \{1, 2, \dots, 2^M\}$ ) as defined in Section 4 (subsection 4.2). Suppose that subindices  $i-1$  and  $j-1$  of  $\hat{S}_{i-1}$  and  $\hat{S}_{j-1}$  are associated with  $i-1 = i_1 i_2 \dots i_M$  and  $j-1 = j_1 j_2 \dots j_M$ . Then  $S_{\Omega^i}$  and  $S_{\Omega^j}$  are two successive sub-regions with the switching boundary  $\Sigma_{ij} = \bar{S}_{\Omega^i} \cap \bar{S}_{\Omega^j}$ , iff there is exactly one  $1 \leq s \leq M$  such that for all  $(z_{i_1 t}, \dots, z_{i_M t})^T \in \bar{S}_{\Omega^i}$  and  $(z_{j_1 t}, \dots, z_{j_M t})^T \in \bar{S}_{\Omega^j}$

$$\begin{cases} z_{i_s t} \cdot z_{j_s t} < 0 \\ z_{i_r t} \cdot z_{j_r t} > 0, 1 \leq r \leq M, r \neq s \end{cases}. \quad (25)$$

Moreover,  $\Sigma_{ij}$  is a closed set ( $\bar{\Sigma}_{ij} = \Sigma_{ij}$ ) and  $\Sigma_{ij} = \mathring{\Sigma}_{ij} \cup \partial \Sigma_{ij}$  such that

$$\begin{aligned} \mathring{\Sigma}_{ij} &= \Sigma_r^s = \left\{ Z_t \in \mathbb{R}^M; z_{st} = 0, \text{ and } \text{sgn}(z_{rt}) = \right. \\ &\quad \left. \text{sgn}(z_{i_r t}) = \text{sgn}(z_{j_r t}), 1 \leq r \leq M, r \neq s \right\}, \end{aligned} \quad (26)$$

and  $\partial \Sigma_{ij} = \bigcup_{\substack{s_m=1 \\ s_m \neq s}}^M \Sigma_{\nu}^{s, s_m}$  where

$$\begin{aligned} \Sigma_{\nu}^{s, s_m} &= \left\{ Z_t \in \mathbb{R}^M; z_{s_m t} = z_{st} = 0, \text{ and } \text{sgn}(z_{\nu t}) \right. \\ &\quad \left. = \text{sgn}(z_{rt}), 1 \leq \nu \leq M, \nu \neq s, s_m \right\}. \end{aligned} \quad (27)$$

Furthermore, it can be proven that

$$\bigcup_{i,j=1}^{2^M} \Sigma_{ij} = \bigcup_{l=1}^{M \cdot 2^{M-1}} \Sigma_l \subset \bigcup_{k=1}^{2^M} S_{\Omega^k} = \mathbb{R}^M. \quad (28)$$

### 7.3. Proof of theorem 3

(1) Without loss of generality let  $t_0 = 0$ . Assume that there exists an equivalent continuous-time system for (10)

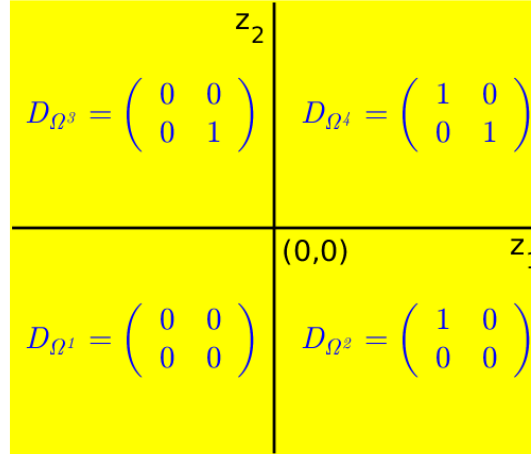

Figure S1. Example of subregions  $S_{\Omega^k}$  and related matrices  $D_{\Omega^k}$  for  $M = 2$ .

on  $[0, \Delta t]$ , in the form of equation (12). By equivalency in the sense of equation (13), we must have

$$Z_0 = \zeta(0), \quad Z_1 = W_{\Omega^k} Z_0 + h = \zeta(\Delta t). \quad (29)$$

According to theorem 1, the solution of system (10) on  $[0, \Delta t]$  is

$$\zeta(t) = e^{\tilde{W}_{\Omega^k} t} \zeta(0) + e^{\tilde{W}_{\Omega^k} t} \int_0^t e^{-\tilde{W}_{\Omega^k} \tau} \tilde{h} d\tau, \quad t \in [0, \Delta t]. \quad (30)$$

If  $\tilde{W}_{\Omega^k}$  is invertible, then

$$\int_0^t e^{-\tilde{W}_{\Omega^k} \tau} \tilde{h} d\tau = -\tilde{W}_{\Omega^k}^{-1} (e^{-\tilde{W}_{\Omega^k} t} - I) \tilde{h}, \quad (31)$$

and thus

$$\begin{aligned} \zeta(t) = e^{\tilde{W}_{\Omega^k} t} \zeta(0) + \left[ e^{\tilde{W}_{\Omega^k} t} (-\tilde{W}_{\Omega^k}^{-1}) e^{-\tilde{W}_{\Omega^k} t} \right. \\ \left. - e^{\tilde{W}_{\Omega^k} t} (-\tilde{W}_{\Omega^k}^{-1}) \right] \tilde{h}. \end{aligned} \quad (32)$$

Furthermore, since

$$(-\tilde{W}_{\Omega^k}^{-1}) e^{-\tilde{W}_{\Omega^k} t} = e^{-\tilde{W}_{\Omega^k} t} (-\tilde{W}_{\Omega^k}^{-1}), \quad (33)$$

we have

$$\zeta(t) = e^{\tilde{W}_{\Omega^k} t} \zeta(0) + \left[ I - e^{\tilde{W}_{\Omega^k} t} \right] (-\tilde{W}_{\Omega^k}^{-1}) \tilde{h} \quad t \in [0, \Delta t]. \quad (34)$$

Putting conditions (29) in

$$\zeta(\Delta t) = e^{\tilde{W}_{\Omega^k} \Delta t} \zeta(0) + \left[ I - e^{\tilde{W}_{\Omega^k} \Delta t} \right] (-\tilde{W}_{\Omega^k}^{-1}) \tilde{h}, \quad (35)$$

yields

$$W_{\Omega^k} Z_0 + h = e^{\tilde{W}_{\Omega^k} \Delta t} Z_0 + \left[ I - e^{\tilde{W}_{\Omega^k} \Delta t} \right] (-\tilde{W}_{\Omega^k}^{-1}) \tilde{h}. \quad (36)$$

Equation (36) has to hold for all  $Z_0$  including  $Z_0 = 0$ . Hence, it is deduced that

$$\begin{cases} W_{\Omega^k} = e^{\tilde{W}_{\Omega^k} \Delta t} \\ h = \left[ I - e^{\tilde{W}_{\Omega^k} \Delta t} \right] (-\tilde{W}_{\Omega^k}^{-1}) \tilde{h} \end{cases} \quad (37)$$

According to (37), matrix  $W_{\Omega^k}$  should be invertible and cannot have any zero eigenvalue. Also, since  $\tilde{W}_{\Omega^k}$  is invertible, it does not have any zero eigenvalue, which implies that  $W_{\Omega^k}$  has no eigenvalue equal to one. Then,  $P_{W_{\Omega^k}}(1) \neq 0$ , which means  $[I - W_{\Omega^k}]$  is invertible and (37) becomes equivalent to (14).

Now, considering  $\tilde{W}_{\Omega^k}$  and  $\tilde{h}$  as in (14), we can obtain the desired equivalent continuous-time system (12) for (10) on  $[0, \Delta t]$ . It is just required to prove that every fixed point  $Z^*$  of map (10) is also an equilibrium point of system (12), and (14) is a solution of (36) for all  $Z^*$ . For this purpose, let  $Z^*$  be a fixed point of (10), then

$$F(Z^*) = W_{\Omega^k} Z^* + h = Z^*. \quad (38)$$

$Z^*$  must be an equilibrium of (12), i.e.

$$G(Z^*) = \tilde{W}_{\Omega^k} Z^* + \tilde{h} = 0. \quad (39)$$

From (38) and (39) it is concluded that

$$h = \left[ I - W_{\Omega^k} \right] (-\tilde{W}_{\Omega^k}^{-1}) \tilde{h}, \quad (40)$$

which shows that (37) or, equivalently, (14) is a solution of (36) for all  $Z^*$  satisfying both relations (38) and (39). Finally, let each Jordan block of  $W_{\Omega^k}$  associated with a negative eigenvalue occur an even number of times. Then, by theorem (2), the logarithm of real matrix  $W_{\Omega^k}$ , i.e. the matrix  $\tilde{W}_{\Omega^k}$  defined in (14), will be real.

(2) Let  $W_{\Omega^k}$  be diagonalizable, then

$$W_{\Omega^k} = V E_k V^{-1}, \quad (41)$$

where  $E_k = \text{diag}(\lambda_1^k, \lambda_2^k, \dots, \lambda_M^k)$  and  $V$  is the matrix of eigenvectors of  $W_{\Omega^k}$ . Since  $W_{\Omega^k}$  is also invertible, by (14)

$$\begin{aligned} \tilde{W}_{\Omega^k} &= \frac{1}{\Delta t} \log(W_{\Omega^k}) = \frac{1}{\Delta t} \log(V E_k V^{-1}) \\ &= V \frac{1}{\Delta t} \log(E_k) V^{-1}, \end{aligned} \quad (42)$$

such that

$$\log(E_k) = \text{diag}(\log(\lambda_1^k), \log(\lambda_2^k), \dots, \log(\lambda_M^k)),$$

which completes the proof.

**Remark.** Due to (37) and (14), one can see that system (12) is homogeneous ( $\tilde{h} = 0$ ) if and only if system (10) is homogeneous ( $h = 0$ ).

#### 7.4. Proof of theorem 4

Again we prove the theorem for  $t_0 = 0$  without loss of generality. Suppose that there is the equivalent continuous-time system (12) for (10) with non-invertible and diagonalizable matrix  $\tilde{W}_{\Omega^k}$ . Similar to the proof of the previous theorem, relations (29) and (30) must hold for (10) and (12). On the other hand, non-invertibility and diagonalizability of  $\tilde{W}_{\Omega^k}$  demand that it has at least one eigenvalue equal to zero and

$$\tilde{W}_{\Omega^k} = V \begin{pmatrix} \mathbf{O}_{n \times n} & 0 \\ 0 & C \end{pmatrix} V^{-1}, \quad (43)$$

where  $\mathbf{O}_{n \times n}$  is a zero matrix corresponding to zero eigenvalues ( $n$  denotes the number of zero eigenvalues) and  $C$  is an invertible matrix corresponding to nonzero eigenvalues of  $\tilde{W}_{\Omega^k}$ . Therefore, for relation (31) we obtain

$$\begin{aligned} &\int_0^t e^{-\tilde{W}_{\Omega^k} \tau} \tilde{h} d\tau = \\ &V \left( \begin{pmatrix} t & \cdots & 0 \\ \vdots & \ddots & \vdots \\ 0 & \cdots & t \end{pmatrix}_{n \times n} \quad 0 \\ &\quad \quad \quad 0 \quad \quad \quad -C^{-1}(e^{-Ct} - I) \end{pmatrix} V^{-1} \tilde{h}. \end{aligned} \quad (44)$$

In this case, relation (35) becomes

$$\begin{aligned} \zeta(\Delta t) &= e^{\tilde{W}_{\Omega^k} \Delta t} \zeta(0) + e^{\tilde{W}_{\Omega^k} \Delta t} V \times \\ &\left( \begin{pmatrix} \Delta t & \cdots & 0 \\ \vdots & \ddots & \vdots \\ 0 & \cdots & \Delta t \end{pmatrix}_{n \times n} \quad 0 \\ &\quad \quad \quad 0 \quad \quad \quad -C^{-1}(e^{-C\Delta t} - I) \end{pmatrix} V^{-1} \tilde{h}. \end{aligned} \quad (45)$$

Inserting conditions (29) into (45) gives

$$\begin{aligned} W_{\Omega^k} Z_0 + h &= e^{\tilde{W}_{\Omega^k} \Delta t} Z_0 + e^{\tilde{W}_{\Omega^k} \Delta t} V \times \\ &\left( \begin{pmatrix} \Delta t & \cdots & 0 \\ \vdots & \ddots & \vdots \\ 0 & \cdots & \Delta t \end{pmatrix}_{n \times n} \quad 0 \\ &\quad \quad \quad 0 \quad \quad \quad -C^{-1}(e^{-C\Delta t} - I) \end{pmatrix} V^{-1} \tilde{h}. \end{aligned} \quad (46)$$

Denoting

$$H = \begin{pmatrix} \Delta t & \cdots & 0 \\ \vdots & \ddots & \vdots \\ 0 & \cdots & \Delta t \end{pmatrix}_{n \times n}, \quad (47)$$

and considering equality (46) for all  $Z_0$ , particularly for  $Z_0 = 0$ , yields

$$\begin{cases} W_{\Omega^k} = e^{\tilde{W}_{\Omega^k} \Delta t} \\ h = e^{\tilde{W}_{\Omega^k} \Delta t} V \begin{pmatrix} H & 0 \\ 0 & -C^{-1}(e^{-C\Delta t} - I) \end{pmatrix} V^{-1} \tilde{h}. \end{cases} \quad (48)$$

Since

$$e^{\tilde{W}_{\Omega^k} \Delta t} = V \begin{pmatrix} I & 0 \\ 0 & e^{C\Delta t} \end{pmatrix} V^{-1}, \quad (49)$$

we can simplify  $h$  in (48) and rewrite it as

$$\begin{cases} W_{\Omega^k} = e^{\tilde{W}_{\Omega^k} \Delta t} \\ h = V \begin{pmatrix} H & 0 \\ 0 & -C^{-1}(I - e^{C\Delta t}) \end{pmatrix} V^{-1} \tilde{h}, \end{cases} \quad (50)$$

or equivalently

$$\begin{cases} \tilde{W}_{\Omega^k} = \frac{1}{\Delta t} \log(W_{\Omega^k}) \\ \tilde{h} = V \begin{pmatrix} H & 0 \\ 0 & -C^{-1}(I - e^{C\Delta t}) \end{pmatrix}^{-1} V^{-1} h. \end{cases} \quad (51)$$

In addition, we can write

$$\begin{aligned}
 \tilde{h} &= V \begin{pmatrix} H & 0 \\ 0 & -C^{-1}(I - e^{C\Delta t}) \end{pmatrix}^{-1} V^{-1}h \\
 &= V \begin{pmatrix} \left( \begin{array}{ccc} \frac{1}{\Delta t} & \cdots & 0 \\ \vdots & \ddots & \vdots \\ 0 & \cdots & \frac{1}{\Delta t} \end{array} \right)_{n \times n} & 0 \\ 0 & C(e^{C\Delta t} - I)^{-1} \end{pmatrix} V^{-1}h \\
 &= V \left[ \frac{1}{\Delta t} \begin{pmatrix} I_n & 0 \\ 0 & O \end{pmatrix} + \begin{pmatrix} O_{n \times n} & 0 \\ 0 & C \end{pmatrix} \right] \\
 &\quad \times \begin{pmatrix} I_n & 0 \\ 0 & (e^{C\Delta t} - I)^{-1} \end{pmatrix} V^{-1}h \\
 &= V \left[ \frac{1}{\Delta t} \begin{pmatrix} I_n & 0 \\ 0 & O \end{pmatrix} + V^{-1} \tilde{W}_{\Omega^k} V \right] \\
 &\quad \times \left[ \begin{pmatrix} I_n & 0 \\ 0 & e^{C\Delta t} \end{pmatrix} - \begin{pmatrix} O_{n \times n} & 0 \\ 0 & I \end{pmatrix} \right]^{-1} V^{-1}h \\
 &= \left[ \frac{1}{\Delta t} \begin{pmatrix} I_n & 0 \\ 0 & O \end{pmatrix} + \tilde{W}_{\Omega^k} \right] \\
 &\quad \times \left[ e^{\tilde{W}_{\Omega^k} \Delta t} - \begin{pmatrix} O_{n \times n} & 0 \\ 0 & I \end{pmatrix} \right]^{-1} h. \tag{52}
 \end{aligned}$$

Therefore

$$\begin{aligned}
 \tilde{W}_{\Omega^k} &= \frac{1}{\Delta t} \log(W_{\Omega^k}), \\
 \tilde{h} &= \left[ -\frac{1}{\Delta t} \begin{pmatrix} I_n & 0 \\ 0 & O \end{pmatrix} - \tilde{W}_{\Omega^k} \right] \\
 &\quad \times \left[ \begin{pmatrix} O_{n \times n} & 0 \\ 0 & I \end{pmatrix} - e^{\tilde{W}_{\Omega^k} \Delta t} \right]^{-1} h \tag{53}
 \end{aligned}$$

which is equivalent to (15).

Finally, from  $W_{\Omega^k} = e^{\tilde{W}_{\Omega^k} \Delta t}$  it is deduced that  $W_{\Omega^k}$  is invertible. It is only necessary to prove that for every point  $Z^*$  satisfying both equations (38) and (39), i.e. equations

$$\begin{cases} (W_{\Omega^k} - I)Z^* = -h \\ \tilde{W}_{\Omega^k} Z^* = -\tilde{h} \end{cases}, \tag{54}$$

relation (15) is a solution of (46). Note that here we cannot simplify (54) to find some equation similar to (40), as neither  $(W_{\Omega^k} - I)$  or  $\tilde{W}_{\Omega^k}$  is invertible. Hence, we show that

(54) fulfills solution (15) or, identically, solution (50). Thus, inserting  $\tilde{h} = -\tilde{W}_{\Omega^k} Z^*$  in (50), we have

$$\begin{aligned}
 h &= e^{\tilde{W}_{\Omega^k} \Delta t} V \begin{pmatrix} H & 0 \\ 0 & -C^{-1}(e^{-C\Delta t} - I) \end{pmatrix} V^{-1} \tilde{h} \\
 &= e^{\tilde{W}_{\Omega^k} \Delta t} V \begin{pmatrix} H & 0 \\ 0 & -C^{-1}(e^{-C\Delta t} - I) \end{pmatrix} V^{-1} (-\tilde{W}_{\Omega^k} Z^*) \\
 &= e^{\tilde{W}_{\Omega^k} \Delta t} V \begin{pmatrix} H & 0 \\ 0 & -(e^{-C\Delta t} - I)C^{-1} \end{pmatrix} V^{-1} V \\
 &\quad \times \begin{pmatrix} O_{n \times n} & 0 \\ 0 & -C \end{pmatrix} V^{-1} Z^* \\
 &= e^{\tilde{W}_{\Omega^k} \Delta t} V \begin{pmatrix} O_{n \times n} & 0 \\ 0 & (e^{-C\Delta t} - I) \end{pmatrix} V^{-1} Z^* \\
 &= e^{\tilde{W}_{\Omega^k} \Delta t} V \left[ \begin{pmatrix} I_n & 0 \\ 0 & e^{-C\Delta t} \end{pmatrix} - \begin{pmatrix} I_n & 0 \\ 0 & I \end{pmatrix} \right] V^{-1} Z^* \\
 &= (I - e^{\tilde{W}_{\Omega^k} \Delta t}) Z^* = (I - W_{\Omega^k}) Z^*, \tag{55}
 \end{aligned}$$

which demonstrates that (54) meets solution (50).

If every Jordan block of  $W_{\Omega^k}$  associated with a negative eigenvalue occurs an even number of times, then theorem (2) guarantees that  $\tilde{W}_{\Omega^k}$  will be real. Also, similar to the proof of theorem 3, it is easy to see that  $\tilde{W}_{\Omega^k}$  will be diagonalizable when  $W_{\Omega^k}$  has no negative real eigenvalues.

## 7.5. Proof of theorem 5

Let  $t_0 = 0$  without loss of generality and assume there exists the equivalent continuous-time system (12) for (10), for which matrix  $W_{\Omega^k}$  is non-invertible. Then, relations (29) and (30) must hold for (10) and (12), analogously to the proofs of the previous theorems. Also, by similar reasoning we have

$$\zeta(\Delta t) = e^{\tilde{W}_{\Omega^k} \Delta t} \zeta(0) + \left[ e^{\tilde{W}_{\Omega^k} \Delta t} \int_0^{\Delta t} e^{-\tilde{W}_{\Omega^k} \tau} d\tau \right] \tilde{h}. \tag{56}$$

Inserting conditions (29) in equation (56) and solving the resulting equation for all  $Z_0$ , including  $Z_0 = 0$ , yields

$$\begin{cases} W_{\Omega^k} = e^{\tilde{W}_{\Omega^k} \Delta t} \\ h = e^{\tilde{W}_{\Omega^k} \Delta t} \left( \int_0^{\Delta t} e^{-\tilde{W}_{\Omega^k} \tau} d\tau \right) \tilde{h}. \end{cases} \tag{57}$$

Now let

$$\lambda \in \text{Spectrum}(\tilde{W}_{\Omega^k}) \Rightarrow \lambda \Delta t \notin 2i\pi\mathbb{Z}^*. \tag{58}$$

Then, by proposition 1,  $\int_0^{\Delta t} e^{-\tilde{W}_{\Omega^k} \tau} d\tau$  is invertible and so

$$\begin{cases} \tilde{W}_{\Omega^k} = \frac{1}{\Delta t} \log(W_{\Omega^k}) \\ \tilde{h} = \left( \int_0^{\Delta t} e^{-\tilde{W}_{\Omega^k} \tau} d\tau \right)^{-1} e^{-\tilde{W}_{\Omega^k} \Delta t} h \end{cases}, \quad (59)$$

which is equal to equation (17). The last point which still has to be proven is that equation (54) meets solution (17) or, identically, (57), for every  $Z^*$ . Since  $\tilde{W}_{\Omega^k}$  is non-invertible, it can be written in the following Jordan form:

$$\tilde{W}_{\Omega^k} = U \begin{pmatrix} B & 0 \\ 0 & C \end{pmatrix} U^{-1}, \quad (60)$$

where  $B$  is a strictly upper triangular matrix and  $C$  is an invertible matrix. Then

$$e^{-\tilde{W}_{\Omega^k} \Delta t} = U \begin{pmatrix} e^{-B \Delta t} & 0 \\ 0 & e^{-C \Delta t} \end{pmatrix} U^{-1}, \quad (61)$$

$$\begin{aligned} \int_0^{\Delta t} e^{-\tilde{W}_{\Omega^k} \tau} \tilde{h} d\tau &= \\ U \begin{pmatrix} \int_0^{\Delta t} e^{-B \tau} d\tau & 0 \\ 0 & -C^{-1}(e^{-C \Delta t} - I) \end{pmatrix} U^{-1}. \end{aligned} \quad (62)$$

Now, substituting  $\tilde{h} = -\tilde{W}_{\Omega^k} Z^*$  in (57) we have

$$\begin{aligned} h &= e^{\tilde{W}_{\Omega^k} \Delta t} \left( \int_0^{\Delta t} e^{-\tilde{W}_{\Omega^k} \tau} d\tau \right) \tilde{h} \\ &= e^{\tilde{W}_{\Omega^k} \Delta t} U \begin{pmatrix} \int_0^{\Delta t} e^{-B \tau} d\tau & 0 \\ 0 & -C^{-1}(e^{-C \Delta t} - I) \end{pmatrix} \\ &\quad \times U^{-1}(-\tilde{W}_{\Omega^k} Z^*) \\ &= e^{\tilde{W}_{\Omega^k} \Delta t} U \begin{pmatrix} \int_0^{\Delta t} e^{-B \tau} d\tau & 0 \\ 0 & -(e^{-C \Delta t} - I) C^{-1} \end{pmatrix} \\ &\quad \times U^{-1} U \begin{pmatrix} -B & 0 \\ 0 & -C \end{pmatrix} U^{-1} Z^* \\ &= e^{\tilde{W}_{\Omega^k} \Delta t} U \begin{pmatrix} \int_0^{\Delta t} -B e^{-B \tau} d\tau & 0 \\ 0 & (e^{-C \Delta t} - I) \end{pmatrix} \\ &\quad \times U^{-1} Z^* \\ &= e^{\tilde{W}_{\Omega^k} \Delta t} U \begin{pmatrix} (e^{-B \Delta t} - I) & 0 \\ 0 & (e^{-C \Delta t} - I) \end{pmatrix} U^{-1} Z^* \\ &= (I - e^{\tilde{W}_{\Omega^k} \Delta t}) Z^* = (I - W_{\Omega^k}) Z^*, \end{aligned} \quad (63)$$

which completes the proof.

Finally, due to theorem (2),  $\tilde{W}_{\Omega^k}$  will be real, provided that each Jordan block of  $W_{\Omega^k}$  related to a negative eigenvalue occurs an even number of times.

**Remark.** In theorem 5, by (62) we have

$$\begin{aligned} \left( \int_0^{\Delta t} e^{-\tilde{W}_{\Omega^k} \tau} d\tau \right)^{-1} &= \quad (64) \\ U \begin{pmatrix} \left( \int_0^{\Delta t} e^{-B \tau} d\tau \right)^{-1} & 0 \\ 0 & (I - e^{-C \Delta t})^{-1} C \end{pmatrix} U^{-1} h. \end{aligned} \quad (65)$$

On the other hand, since  $C$  is invertible,  $\det(I - e^{-C \Delta t}) \neq 0$ . Therefore,  $\int_0^{\Delta t} e^{-\tilde{W}_{\Omega^k} \tau} d\tau$  is invertible if and only if  $\int_0^{\Delta t} e^{-B \tau} d\tau$  is invertible. Thus, for invertibility of  $\int_0^{\Delta t} e^{-\tilde{W}_{\Omega^k} \tau} d\tau$ , it is required that relation (58) holds only for any pair of eigenvalues of  $B$ .

## 7.6. Grazing bifurcation

Here we investigate a grazing bifurcation of periodic orbits for the continuous PLRNN derived from the van-der-Pol oscillator (Example 1). For this purpose, we consider the converted continuous-time system locally in the neighborhood of only one border

$$\Sigma = \left\{ \zeta = (\zeta_1, \zeta_2, \dots, \zeta_{10})^T \in \mathbb{R}^{10} \mid H(\zeta) = \zeta_2 = 0 \right\},$$

where the scalar function  $H : \mathbb{R}^{10} \rightarrow \mathbb{R}$  defines the border and has non-vanishing gradient. According to (di Bernardo & Hogani, 2010; Monfared et al., 2017), a periodic orbit  $\hat{\zeta}(t)$  undergoes a grazing bifurcation for some critical value of a bifurcation parameter, if it is a grazing orbit for some  $t = t^*$ . This means  $\hat{\zeta}(t)$  hits  $\Sigma$  tangentially at the grazing point  $\hat{\zeta}^* = \hat{\zeta}(t^*)$  and satisfies the following conditions:

$$H(\hat{\zeta}^*) = \hat{\zeta}_2^* = 0,$$

$$\nabla H(\hat{\zeta}^*) = (0, 1, 0, \dots, 0)^T \neq 0,$$

$$\langle \nabla H(\hat{\zeta}^*), \tilde{W}_{\Omega^1} \hat{\zeta}^* + \tilde{h}_1 \rangle = \sum_{\substack{j=1 \\ j \neq 2}}^{10} \tilde{w}_{2j}^{(1)} \hat{\zeta}_j^* + \tilde{h}_{12} = 0,$$

$$\langle \nabla H(\hat{\zeta}^*), \tilde{W}_{\Omega^2} \hat{\zeta}^* + \tilde{h}_2 \rangle = \sum_{\substack{j=1 \\ j \neq 2}}^{10} \tilde{w}_{2j}^{(2)} \hat{\zeta}_j^* + \tilde{h}_{22} = 0,$$

$$\begin{aligned} & \langle \nabla H(\hat{\zeta}^*), \tilde{W}_{\Omega^1}^2 \hat{\zeta}^* + \tilde{W}_{\Omega^1} \tilde{h}_1 \rangle + \langle \nabla^2 H(\hat{\zeta}^*)(\tilde{W}_{\Omega^1} \hat{\zeta}^* \\ & + \tilde{h}_1), \tilde{W}_{\Omega^1} \hat{\zeta}^* + \tilde{h}_1 \rangle = \sum_{\substack{j=1 \\ j \neq 2}}^{10} \tilde{v}_{2j}^{(1)} \hat{\zeta}_j^* + \sum_{\substack{j=1 \\ j \neq 2}}^{10} \tilde{w}_{2j}^{(1)} \tilde{h}_{1j} = 0, \end{aligned}$$

$$\begin{aligned} & \langle \nabla H(\hat{\zeta}^*), \tilde{W}_{\Omega^2}^2 \hat{\zeta}^* + \tilde{W}_{\Omega^2} \tilde{h}_2 \rangle + \langle \nabla^2 H(\hat{\zeta}^*)(\tilde{W}_{\Omega^2} \hat{\zeta}^* \\ & + \tilde{h}_2), \tilde{W}_{\Omega^2} \hat{\zeta}^* + \tilde{h}_2 \rangle = \sum_{\substack{j=1 \\ j \neq 2}}^{10} \tilde{v}_{2j}^{(2)} \hat{\zeta}_j^* + \sum_{\substack{j=1 \\ j \neq 2}}^{10} \tilde{w}_{2j}^{(2)} \tilde{h}_{2j} = 0, \end{aligned}$$

where  $\tilde{W}_{\Omega^1} = [\tilde{w}_{ij}^{(1)}]$ ,  $\tilde{W}_{\Omega^2} = [\tilde{w}_{ij}^{(2)}]$ ,  $\tilde{W}_{\Omega^1}^2 = [\tilde{v}_{ij}^{(1)}]$  and  $\tilde{W}_{\Omega^2}^2 = [\tilde{v}_{ij}^{(2)}]$ .

In this case the periodic orbit  $\hat{\zeta}(t)$  crosses  $\Sigma$  transversally as the bifurcation parameter passes through the bifurcation value. The grazing bifurcation leads to a transition or a sudden jump in the system's response by the dis-/appearance of a tangential intersection between the trajectory and the switching boundary. The occurrence of a grazing bifurcation in the continuous PLRNN is illustrated in Fig. 2.
